# Supplementary material
Source: MDPI journal article supplement (https://www.mdpi.com/2813-0618/2/4/27)
Supplement: s1 [file s1]

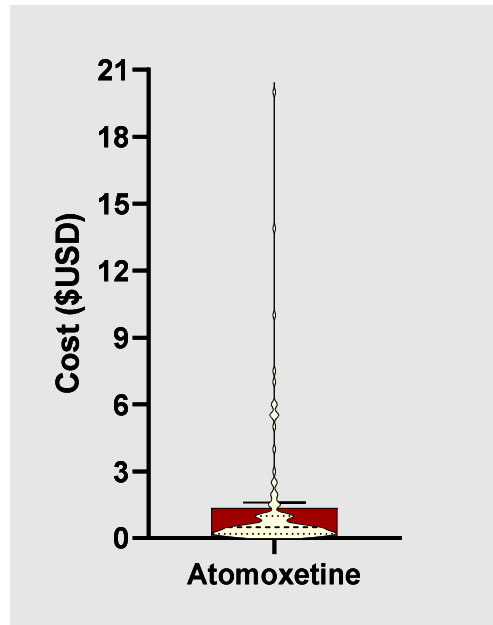

**Figure S1.** Atomoxetine average price per milligram superimposed on a violin plot (Median = USD 0.05, Min = USD 0.01, Max = USD 20.00).
